# Supplementary material for: Neutrophil extracellular traps (NETs) exacerbate severity of infant sepsis
Source: PubMed Central journal article supplement (PMC6454713; doi:10.1186/s13054-019-2407-8), 2019-04-08
Supplement: 13054_2019_2407_MOESM1_ESM.pdf [file 13054_2019_2407_MOESM1_ESM.pdf]

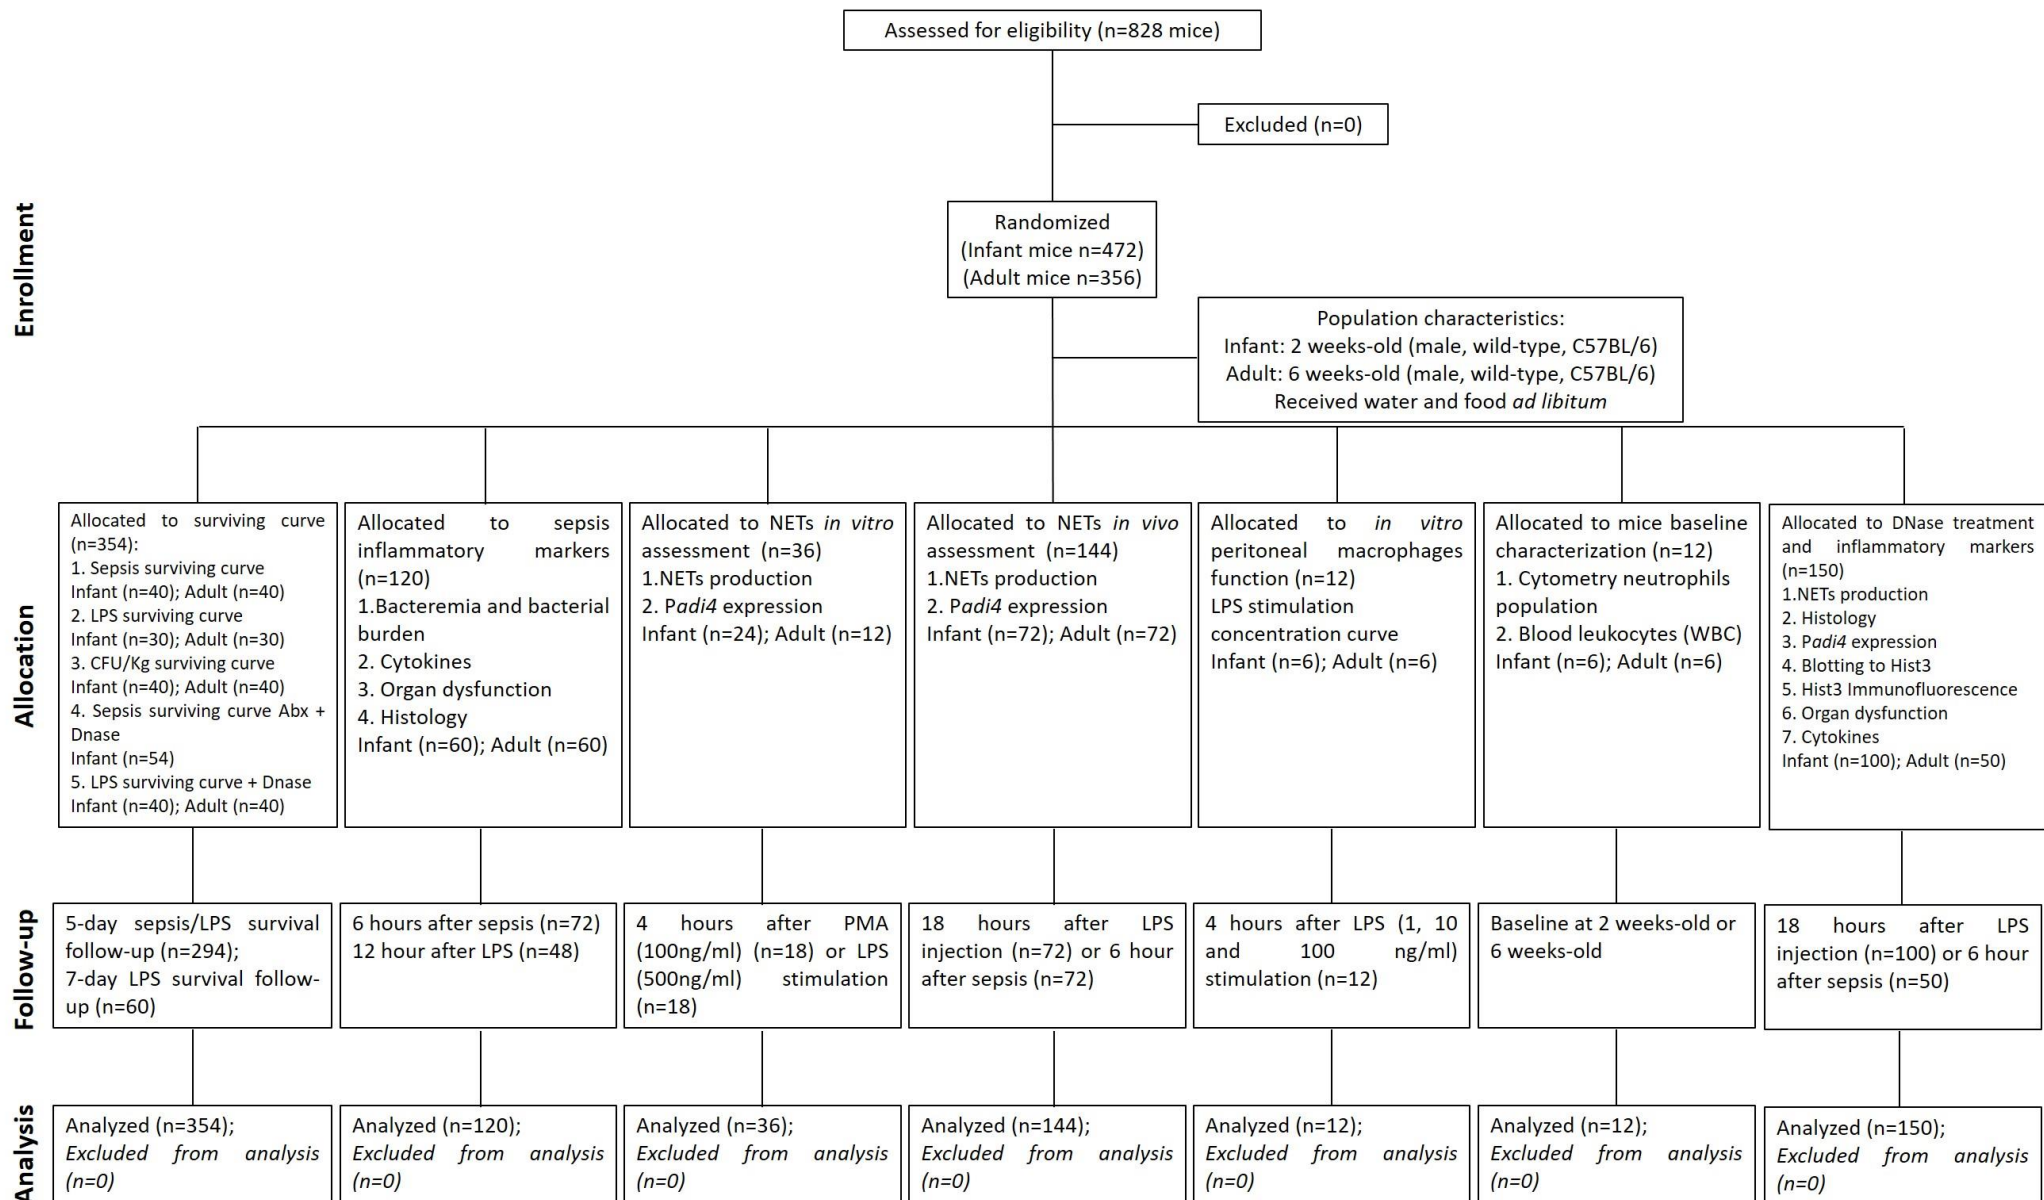

**FIGURE S1. CONSORT diagram of the study.**
