# Supplementary material for: Neutrophil extracellular traps (NETs) exacerbate severity of infant sepsis
Source: PubMed Central journal article supplement (PMC6454713; doi:10.1186/s13054-019-2407-8), 2019-04-08
Supplement: 13054_2019_2407_MOESM5_ESM.pdf [file 13054_2019_2407_MOESM5_ESM.pdf]

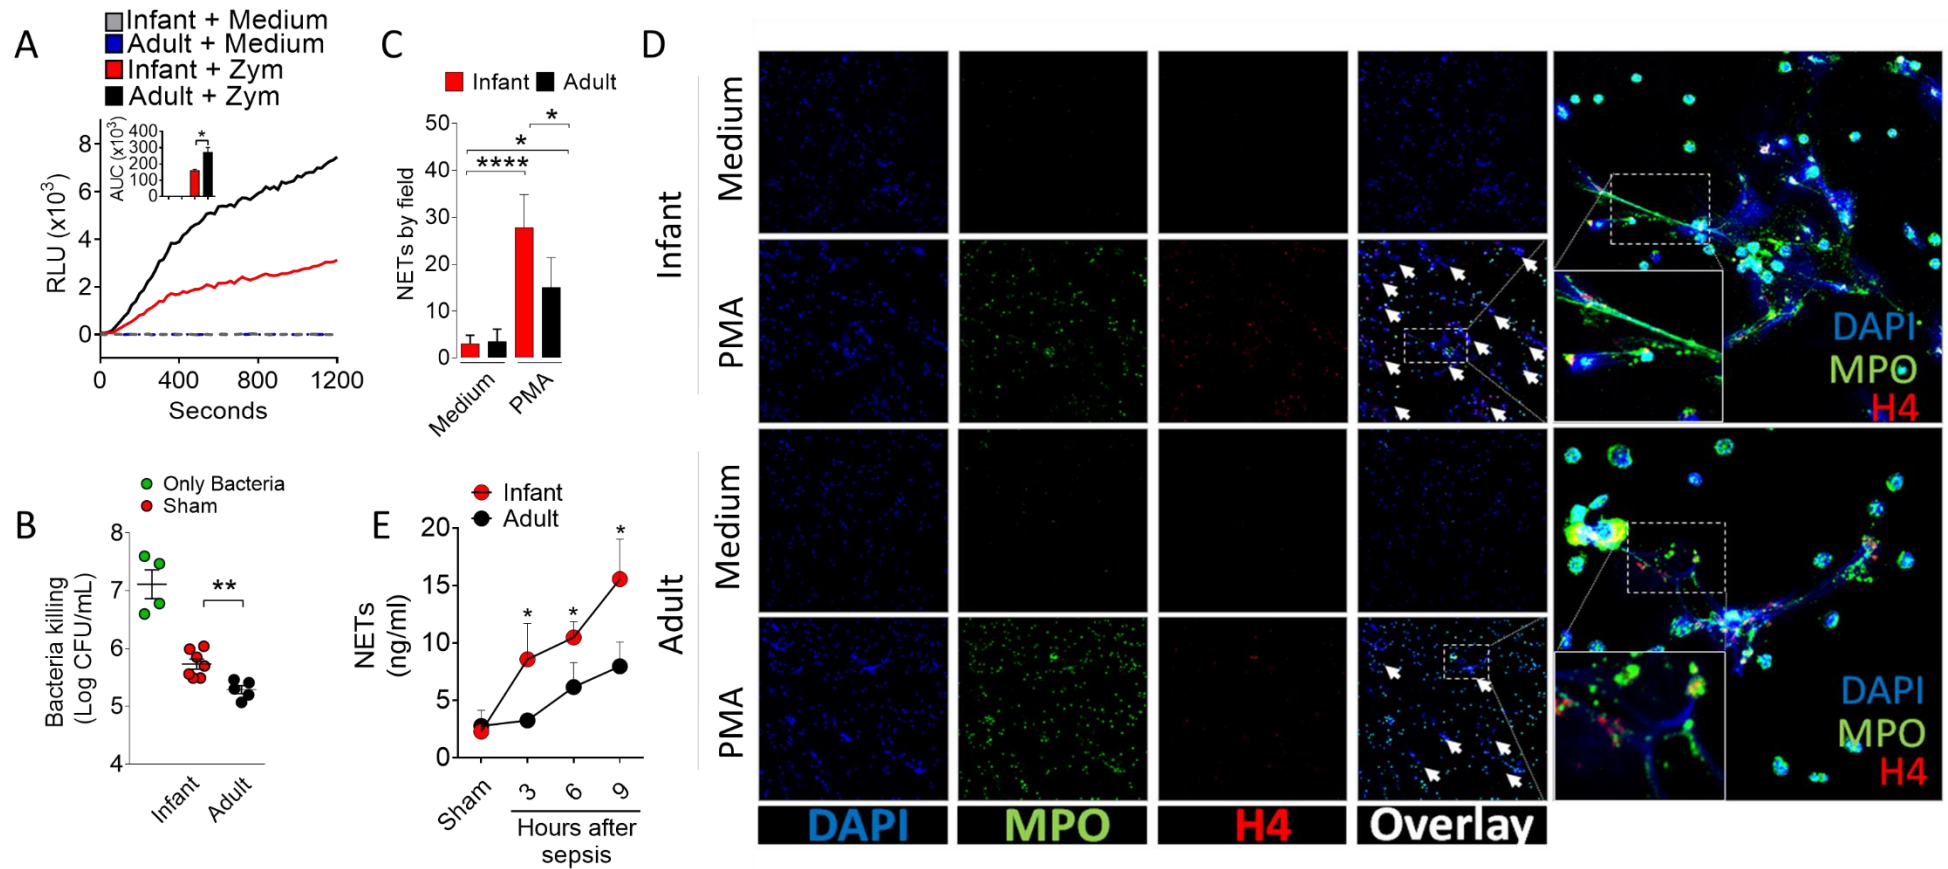

**FIGURE S4. NET production by infant and adult neutrophils.** (A) Bone marrow-isolated neutrophils from mice were cultured with zymosan (20 mg/ml) for 20 min and the production of ROS determined. (B) Peritoneal cavity macrophages ( $1 \times 10^6$ ) from adult and infant were collected and incubated with bacteria of the cecal content ( $2 \times 10^6$ ) previously opsonized with 10% serum and incubated for 3 h at  $37^\circ\text{C}$ . After incubation, the cells were lysed and seeded at the  $10^{-4}$  dilution. (C-D) Bone Marrow neutrophils ( $1 \times 10^6$ ) from infant and adult mice were stimulated in vitro with PMA (100 ng/mL) for 4 h. Representative immunofluorescence images of NETs released by neutrophils and quantitation of NETs by field. (E) NETs concentration in the serum was determined 3, 6 and 9 h after sepsis induction. Results are presented as the mean  $\pm$  SEM,  $n = 6-8$  per group and are representative of 3 experiments. Phagocytic killing is presented as log of UFC/mL. \*  $p < 0.05$  and \*\*  $p < 0.01$ .
