# Supplementary material for: Neutrophil extracellular traps (NETs) exacerbate severity of infant sepsis
Source: PubMed Central journal article supplement (PMC6454713; doi:10.1186/s13054-019-2407-8), 2019-04-08
Supplement: 13054_2019_2407_MOESM9_ESM.pdf [file 13054_2019_2407_MOESM9_ESM.pdf]

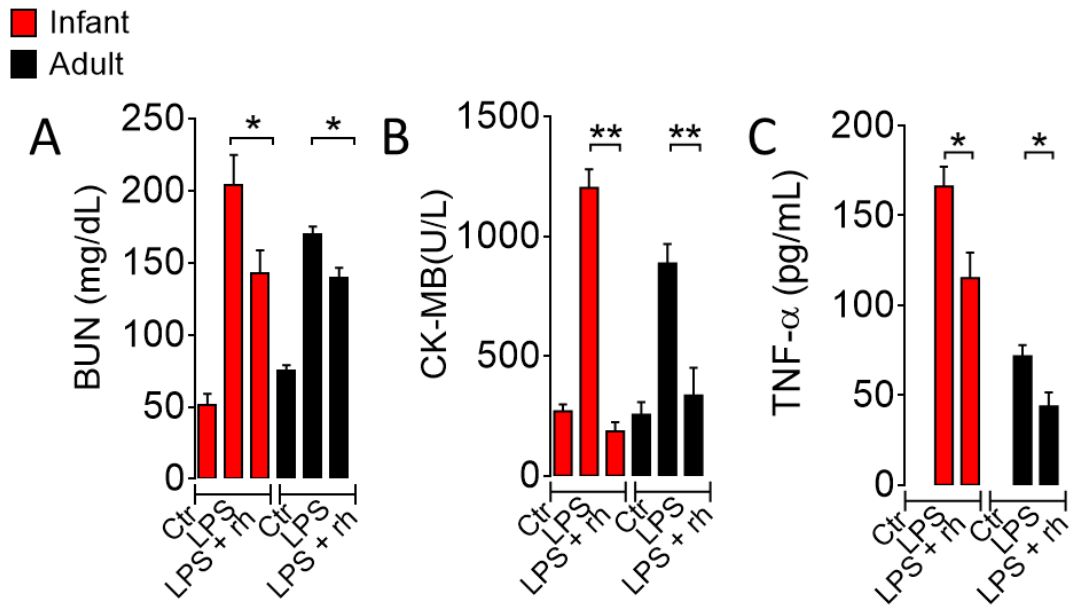

**FIGURE S7. Degradation of NETs improves the outcome of LPS endotoxemia.** (A) BUN, CK-MB (B) and TNF- $\alpha$  (C) in the serum of mice 18 h after LPS injection and treated or not with rhDNase (rh). Data are mean  $\pm$  SEM, n=5-6, representative of two experiments, \*p<0.05 and \*\* p<0.01 (one way-ANOVA, Bonferroni's).
