# Supplementary material for: Neutrophil extracellular traps (NETs) exacerbate severity of infant sepsis
Source: PubMed Central journal article supplement (PMC6454713; doi:10.1186/s13054-019-2407-8), 2019-04-08
Supplement: 13054_2019_2407_MOESM12_ESM.pdf [file 13054_2019_2407_MOESM12_ESM.pdf]

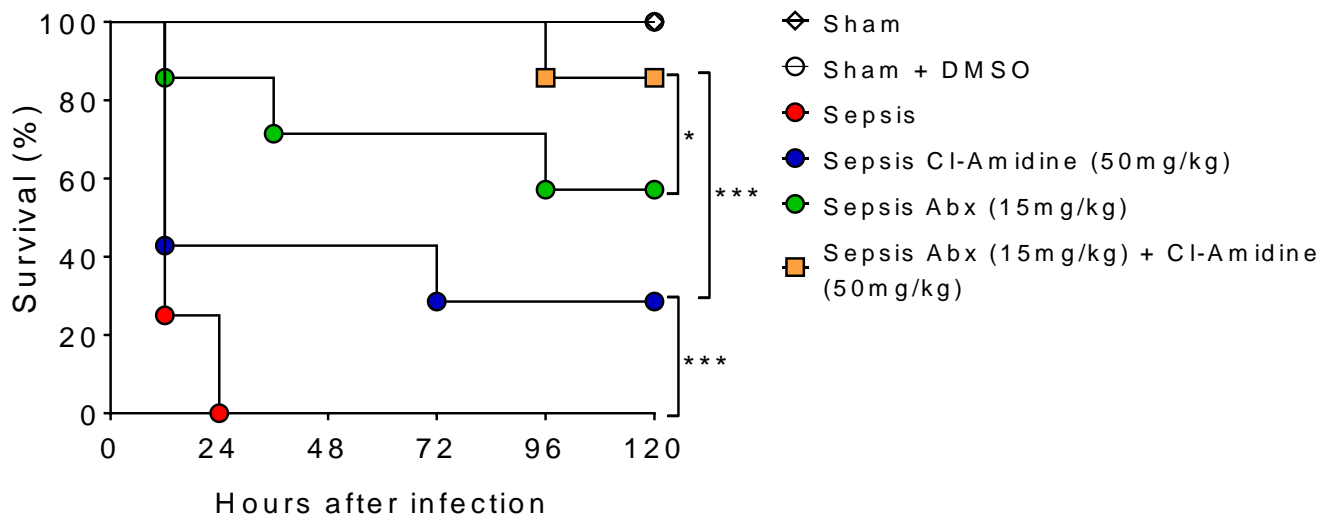

**FIGURE S10. Inhibition of PAD4 improves the outcome of sepsis.** Infant mice were injected with microbial suspension and treated i.p with Cl-amidine (PAD4 inhibitor) 50 mg/kg 1 h before sepsis with or without antibiotic association. n=5-6. \* p<0.05 and \*\*\* p<0.001 (Mantel-Cox log-rank test).
