# Supplementary material for: Neutrophil extracellular traps (NETs) exacerbate severity of infant sepsis
Source: Springer Nature journal article supplement (doi:10.1186/s13054-019-2407-8), 2019-04-08
Supplement: MOESM4 [file 16629872]

**TABLE S1** – Infant mice exhibited more vascular hypo-responsiveness.

| <b>Groups</b>        | <b>pD<sub>2</sub> values 6 h</b> |
|----------------------|----------------------------------|
| <b>Infant Sham</b>   | 5.84 ± 0.03                      |
| <b>Infant Sepsis</b> | 5.17 ± 0.33 <sup>#,*</sup>       |
| <b>Adult Sham</b>    | 6.85 ± 0.08                      |
| <b>Adult Sepsis</b>  | 6.2 ± 0.14 <sup>&amp;</sup>      |

pD<sub>2</sub> of concentration-response curve to phenylephrine (10-10-10-5 mol/L) 6 h after sepsis. Data are the mean ± SEM, n=5-6, representative of two experiments, #p<0.05 Infant septic vs. Infant Sham; &p<0.05 Adult Septic vs. Adult Sham; \*p<0.05 Infant Septic vs. Adult Septic (% of maximum response, one way-ANOVA, Bonferroni's).

\* pD<sub>2</sub> = -log (EC<sub>50</sub>), EC<sub>50</sub>: Half maximal effective concentration.
