# Supplementary material for: Neutrophil extracellular traps (NETs) exacerbate severity of infant sepsis
Source: Springer Nature journal article supplement (doi:10.1186/s13054-019-2407-8), 2019-04-08
Supplement: MOESM6 [file 16629872]

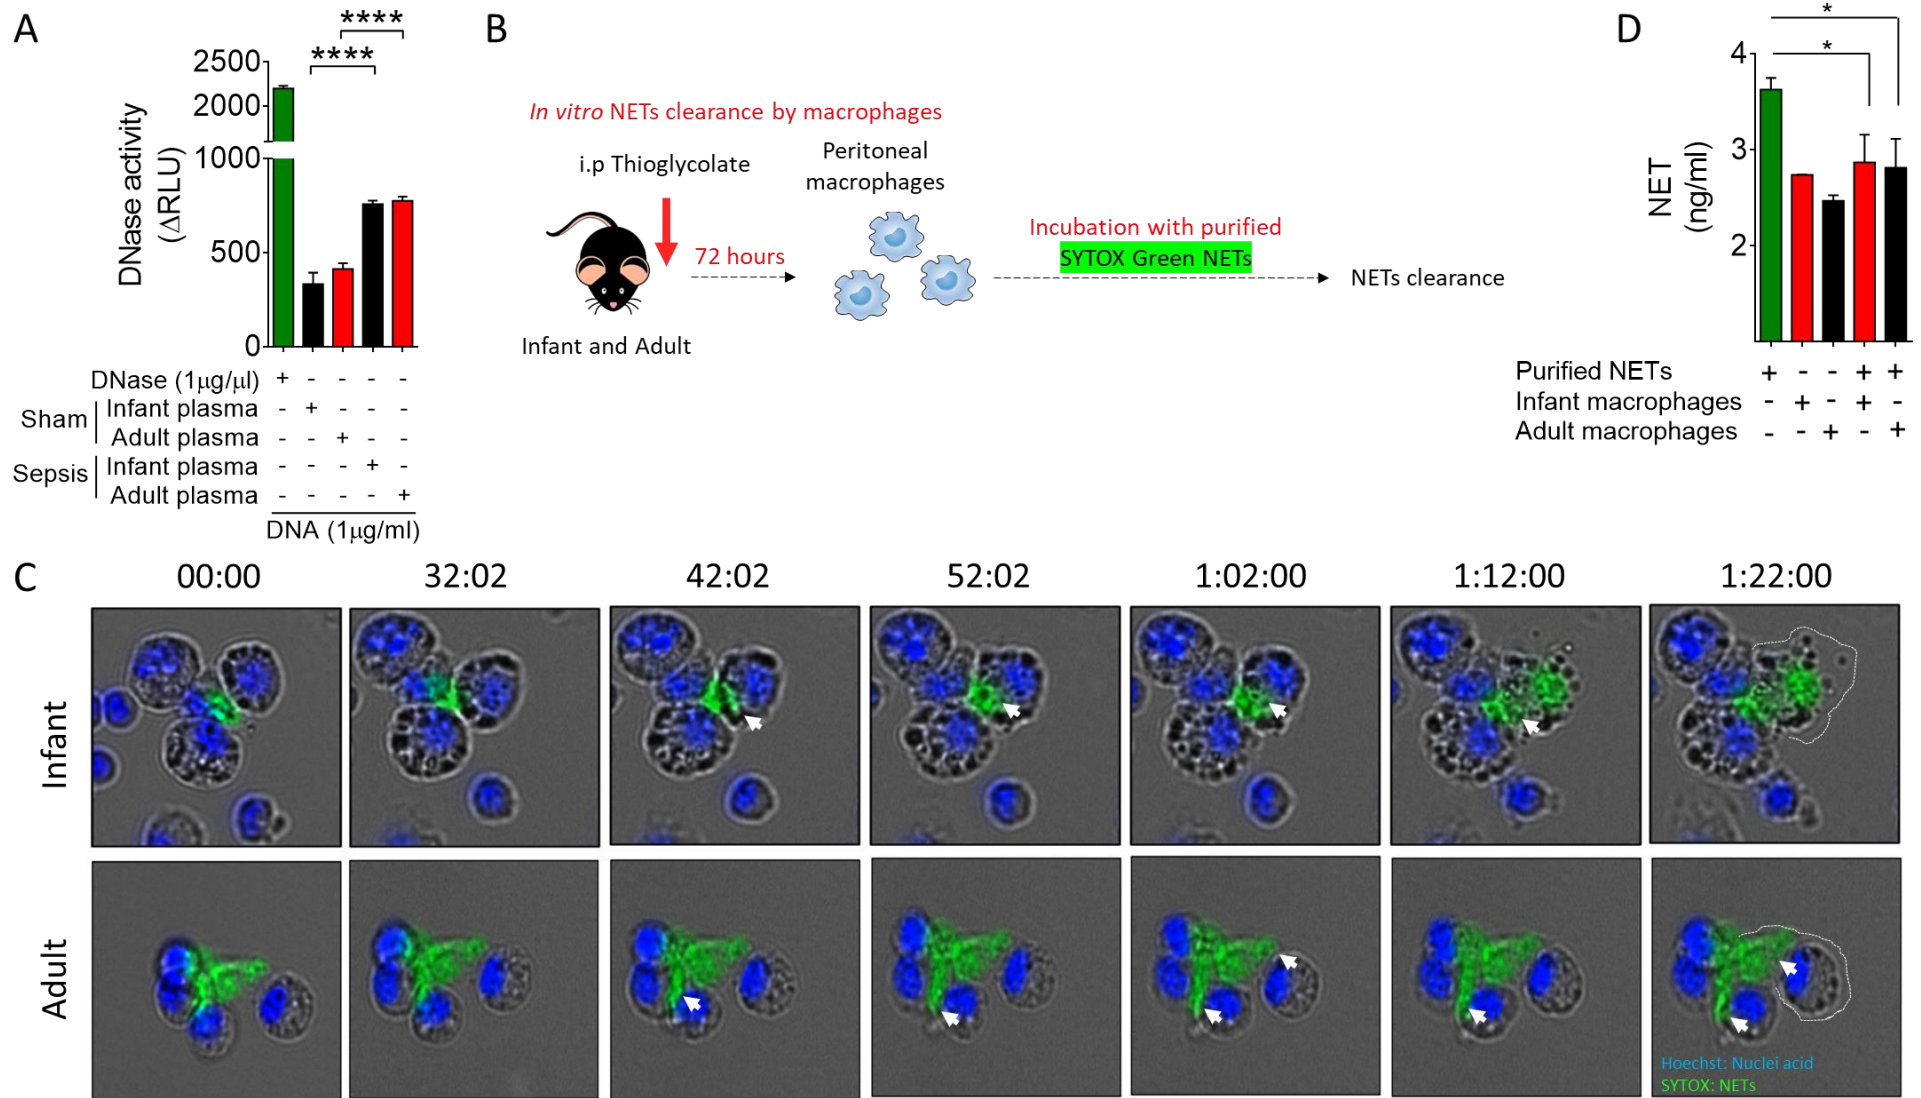

**FIGURE S5. The levels of NETs clearance by serum DNase or macrophage phagocytosis from adult and infant mice are similar.** Animals undergoing sepsis were euthanized 6 h after infection and blood was collected. **(A)** DNase plasma activity 6 h after sepsis. **(B)** Protocol of NETs macrophages clearance. **(C)** Representative time course of SYTOX-green NETs macrophages clearance. **(D)** Remaining NETs levels in the culture supernatants of macrophages and purified NETs (4 ng/mL) after 4 h. Results are mean ± SEM, n = 6-8 per group and are representative of 2 experiments. \* p < 0.05, \*\* p < 0.01 and \*\*\*\* p < 0.0001.
