# Supplementary material for: Neutrophil extracellular traps (NETs) exacerbate severity of infant sepsis
Source: Springer Nature journal article supplement (doi:10.1186/s13054-019-2407-8), 2019-04-08
Supplement: MOESM8 [file 16629872]

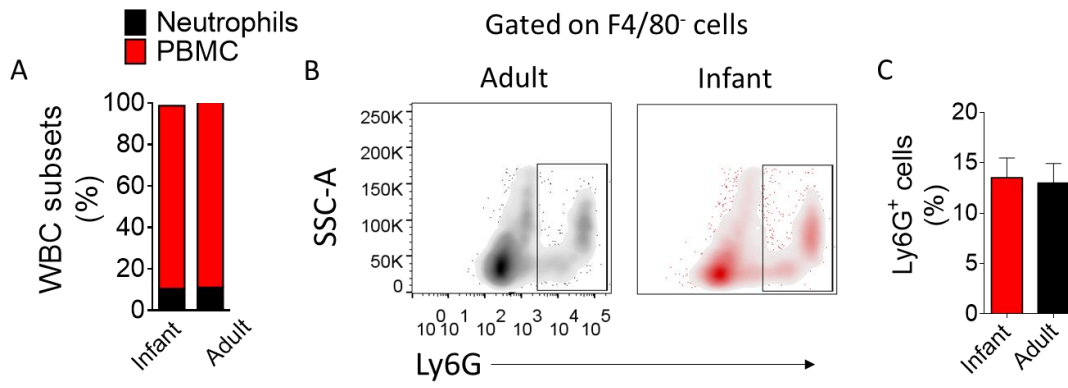

**FIGURE S6.** (A) White Blood Cells (WBC) in infant and adult mice. (B-C) Frequency and representative Flow Plots of spleen neutrophils (F4/80<sup>-</sup>-Ly6G<sup>+</sup> cells) in infant and adult mice. Results are mean  $\pm$  SEM, n = 6-8 per group and are representative of 3 experiments.
