# Supplementary material for: Neutrophil extracellular traps (NETs) exacerbate severity of infant sepsis
Source: Springer Nature journal article supplement (doi:10.1186/s13054-019-2407-8), 2019-04-08
Supplement: MOESM10 [file 16629872]

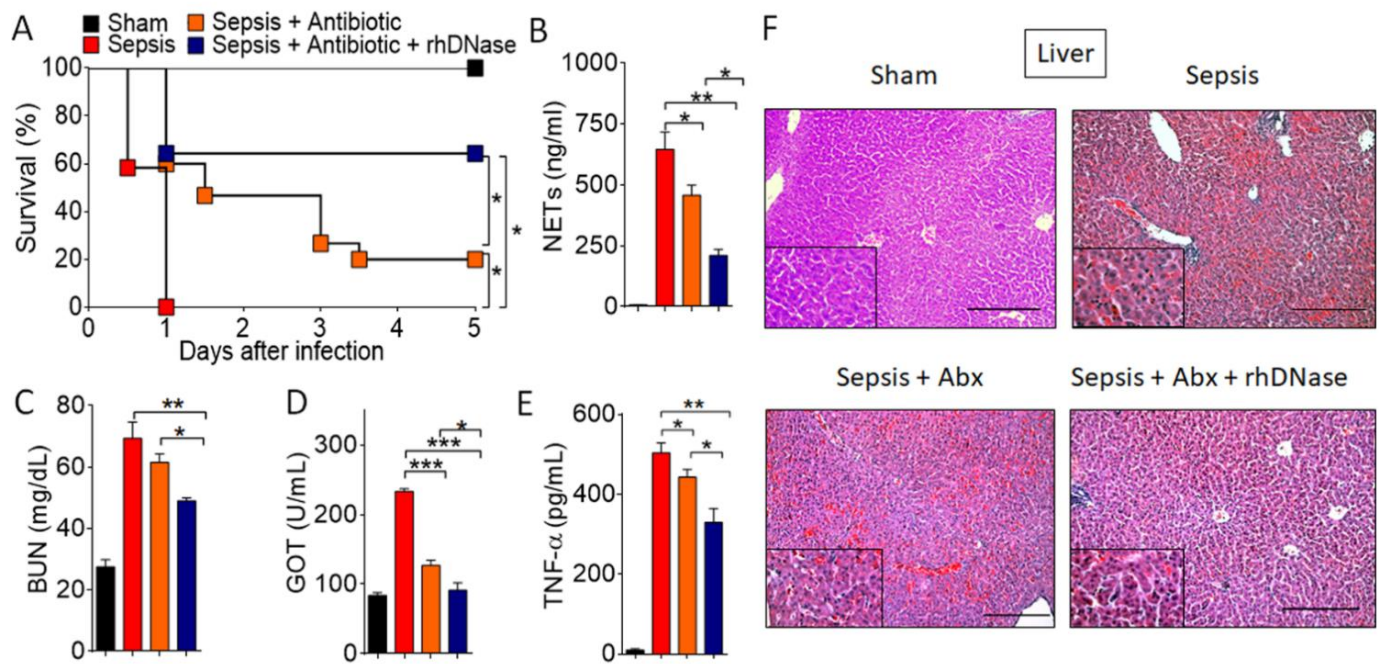

**FIGURE S8. Degradation of NETs improves the outcome of sepsis.** (A) Survival of infant septic mice treated with saline, antibiotics (Abx) alone, or Abx + rhDNase (10 mg/kg s.c.). (B) NETs, (C) BUN, (D) GOT and (E) TNF- $\alpha$  levels in the serum 6 h after sepsis induction were measured. (F) Representative liver sections from the indicated groups were stained with hematoxylin/eosin for histological examination, 20x and 40x magnification. Bars = 100  $\mu$ m. Data are mean  $\pm$  SEM, n=5-6, representative of two experiments, \*p<0.05, \*\* p<0.01 and \*\*\* p<0.001 (A, Mantel-Cox log-rank test; B – E, one way-ANOVA, Bonferroni's).
