# Supplementary material for: Neutrophil extracellular traps (NETs) exacerbate severity of infant sepsis
Source: Springer Nature journal article supplement (doi:10.1186/s13054-019-2407-8), 2019-04-08
Supplement: MOESM13 [file 16629872]

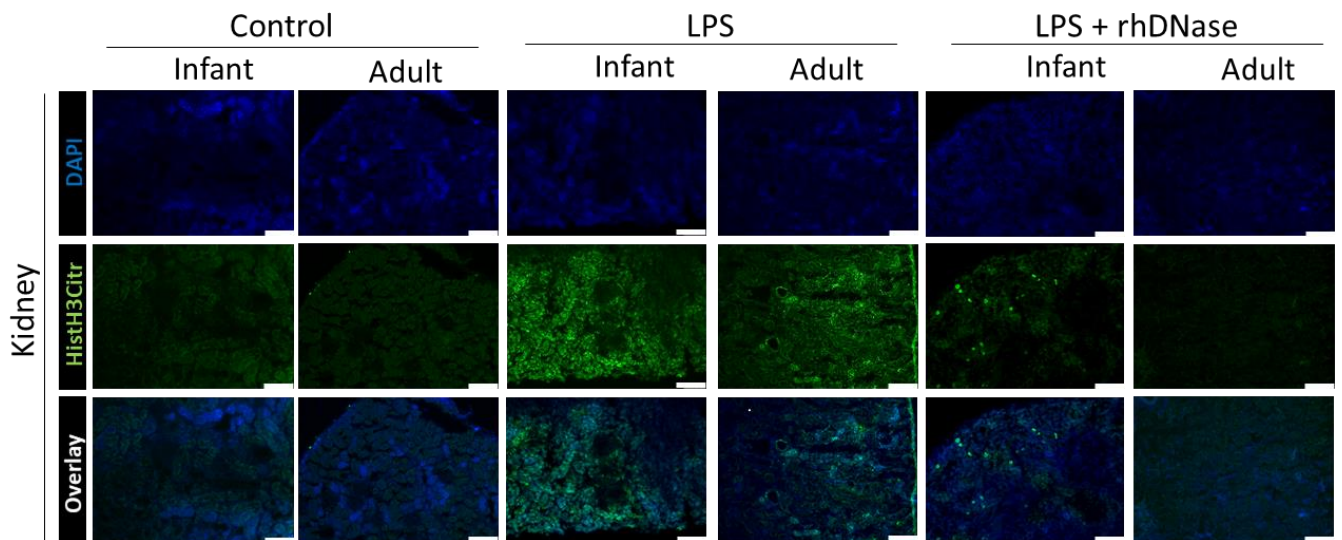

**FIGURE S11. Degradation of NETs decreases histone citrullination in endotoxemic mice.** Representative images of immunofluorescence of histone H3 citrullination in the kidney of infant or adult mice 18 h after LPS injection. Bars = 50  $\mu$ m. Data are mean  $\pm$  SEM, n=5-6 per group.
